# Supplementary material for: Postmortem Cardiopulmonary Pathology in Patients with COVID-19 Infection: Single-Center Report of 12 Autopsies from Lausanne, Switzerland
Source: MDPI journal article supplement (doi:10.3390/diagnostics11081357), 2021-07-28
Supplement: s1 [file s1]

Supplementary Materials:

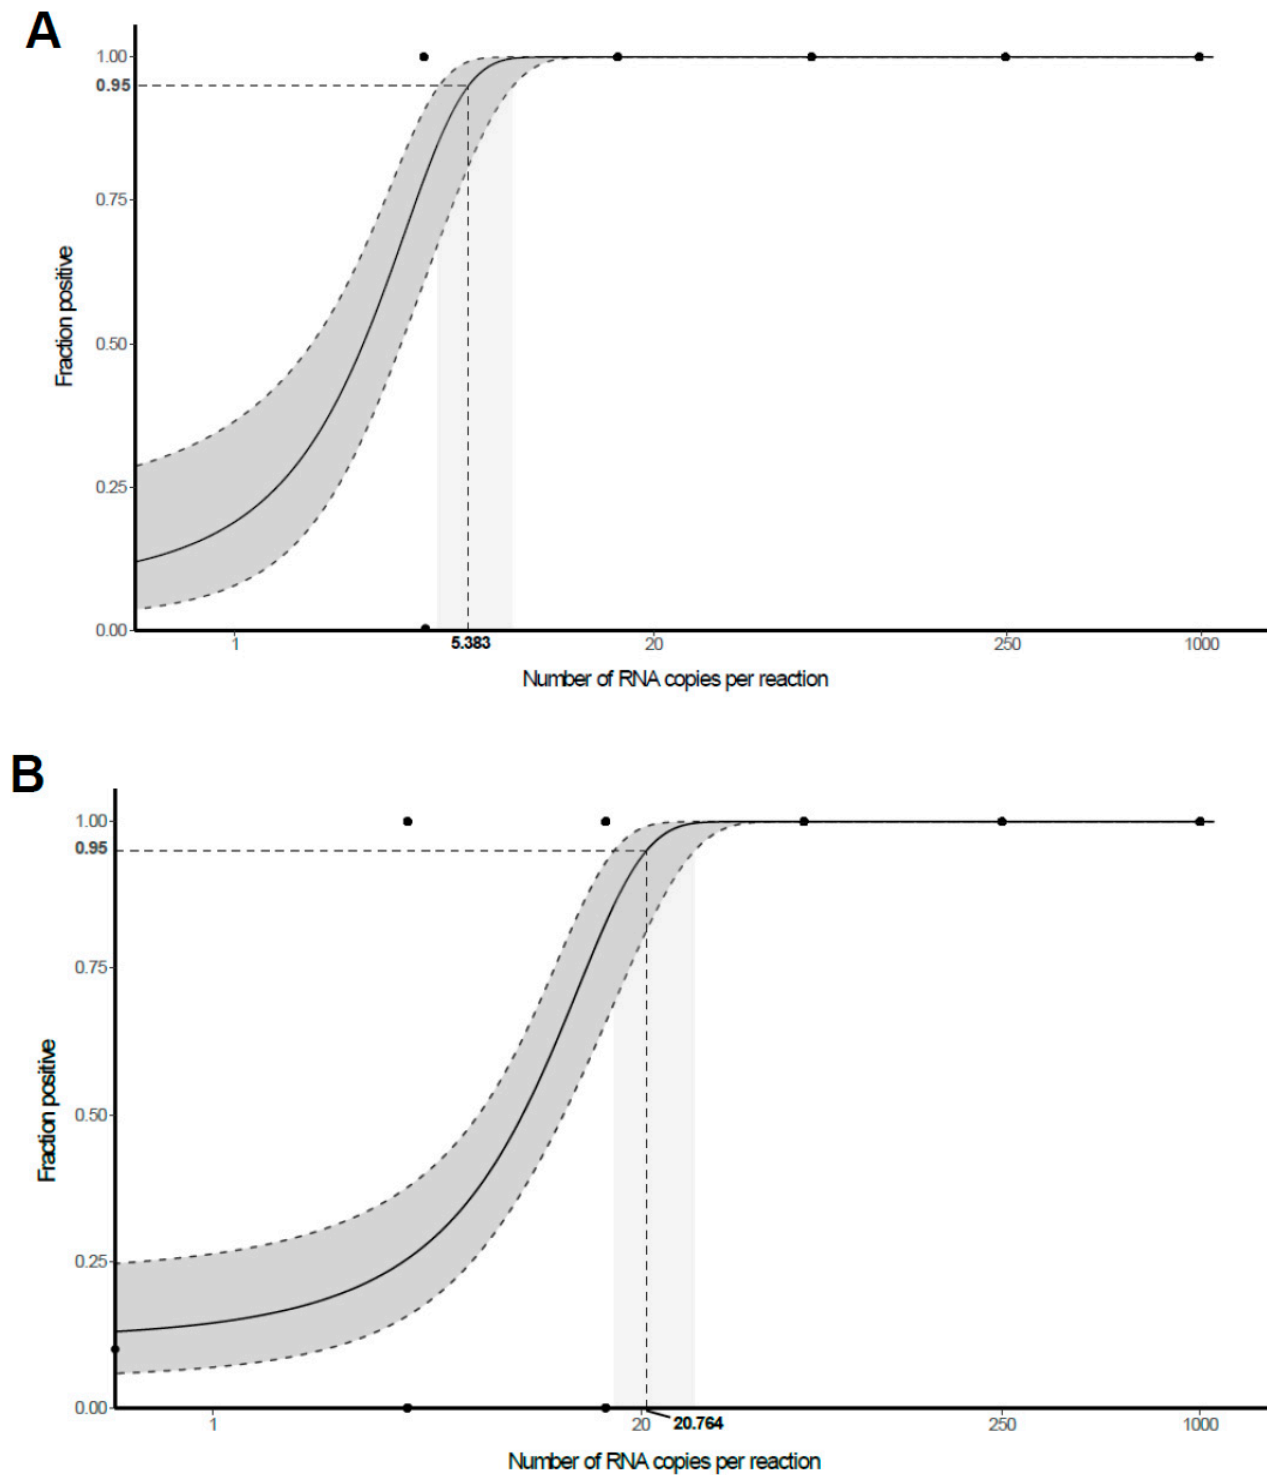

**Figure S1.** Determination of limit of detection (LoD) based on *in vitro* transcribed viral RNA of E gene and RdRp. Probit analysis revealed a LoD of 5.383 (95% CI: 4.365-7.409) RNA copies per reaction at 95% probability for E gene assay (A) and 20.764 (95% CI: 16.565-29.067) for RdRp assay (B).

**Supplementary Table S1.** Clinical details on the patient cohort.

| Case | Gender, age (years) | BMI (kg/m2) | Duration of symptoms, [mechanical ventilation] (days) | Medication                                                                                |                                                                           | Comorbidities and risk factors                                                                         |                                                                                           |                                                                                                                                                                                    |
|------|---------------------|-------------|-------------------------------------------------------|-------------------------------------------------------------------------------------------|---------------------------------------------------------------------------|--------------------------------------------------------------------------------------------------------|-------------------------------------------------------------------------------------------|------------------------------------------------------------------------------------------------------------------------------------------------------------------------------------|
|      |                     |             |                                                       | COVID-19 related treatments (antiviral, antibiotics, hydroxychloroquin, corticosteroids ) | Other relevant medication (anticoagulation and/or interfering with RAAS*) | Cardio-vascular                                                                                        | Pulmonary                                                                                 | others                                                                                                                                                                             |
| 1    | F, 72               | 31.6        | 6 [-]                                                 | Lopinavir/ritonavir (Kaletra)<br>Remdesevir                                               | Lisinopril <sup>s</sup>                                                   | -cardiomyopathy (arrhythmogenic, hypertensive and toxic due to chemotherapy)<br>-systemic hypertension | -sleep apnea syndrome                                                                     | -follicular lymphoma grade I-II (in remission)<br>-lymphopenia (0.23G/L)<br>-hypothyroidism (substitution therapy)<br>-mixed anxiety-depressive disorder (treated with Citalopram) |
| 2    | F, 72               | 22.1        | 8 [-]                                                 | Co-amoxicillin<br>Piperacillin–Tazobactam                                                 | Furosemide<br>Apixaban*                                                   | -systemic hypertension with peripheral arterial disease                                                | -COPD, not staged<br>-former smoker (58py), stopped 3 years ago                           | -chronic renal insufficiency, not staged<br>-bipolar disorder, under lithium treatment<br>-substituted hypothyroidism                                                              |
| 3    | M, 96               | 25.3        | 8 [-]                                                 | Co-amoxicillin<br>Hydroxychloroquin                                                       | Apixaban*                                                                 | -                                                                                                      | -h/o community acquired pneumonia 1 year ago<br>-h/o pulmonary embolism (right middle and | -chronic renal insufficiency KDIGO G3bAx<br>-severe scoliosis<br>-femoral head prosthesis since 2 years<br>-h/o TURP                                                               |

|   |       |      |        |                                                                                             |                                                   |                                                                                                             |                                                        |                                                                                                                                                                                                                                                                                                                                                         |
|---|-------|------|--------|---------------------------------------------------------------------------------------------|---------------------------------------------------|-------------------------------------------------------------------------------------------------------------|--------------------------------------------------------|---------------------------------------------------------------------------------------------------------------------------------------------------------------------------------------------------------------------------------------------------------------------------------------------------------------------------------------------------------|
|   |       |      |        |                                                                                             |                                                   |                                                                                                             | inferior lobe) 1<br>year ago                           |                                                                                                                                                                                                                                                                                                                                                         |
| 4 | M, 86 | 24.2 | 10 [3] | Atazanavir (Reyataz)<br>Co-amoxicillin                                                      | Calciparine:<br>unfractionated heparin*           | -DM type II<br>-dyslipidemia                                                                                | -                                                      |                                                                                                                                                                                                                                                                                                                                                         |
| 5 | F, 74 | 33.3 | 11 [5] | Levofloxacin<br>Piperacillin<br>Tazobactam<br>Atazanavir<br>Hydroxychloroquin<br>Remdesevir | Clexane: low<br>molecular weight<br>heparin*      | -arrhythmogenic<br>cardiomyopathy<br>(pacemaker)<br>-systemic hypertension                                  | -COPD stage III<br>-asthma<br>-sleep apnea<br>syndrome | -mixed anxiety-depressive disorder<br>(treated)<br>-hiatal hernia<br>-substituted hypothyroidism<br>following subtotal thyroidectomy<br>for multinodular goiter                                                                                                                                                                                         |
| 6 | F, 71 | 28.7 | 14 [-] | Hydroxychloroquin<br>Ceftriaxone                                                            |                                                   | -ischemic<br>cardiomyopathy<br>-h/o myocardial<br>infarction (not dated)<br>-h/o myocarditis 8 years<br>ago |                                                        | -regenerative normocytic<br>normochromic anemia<br>-acute confusional state (hypo and<br>hyperactive) of multifactorial origin<br>-gait and balance instability<br>-mixed anxiety-depressive disorder<br>-moderate mental retardation<br>-h/o hysterectomy (not dated)<br>-h/o urinary sepsis with renal<br>insufficiency (KDIGO stage 3) 1 year<br>ago |
| 7 | M, 35 | 21   | 15 [2] | Piperacillin/<br>Tazobactam                                                                 |                                                   | -                                                                                                           | -                                                      | -Tetraplegia (due to a road accident<br>13 years ago)                                                                                                                                                                                                                                                                                                   |
| 8 | M, 79 | 28   | 16 [4] | Amoxicillin-clavulanic<br>acid<br>Tazobactam<br>Hydroxychloroquin<br>Atazanavir             | Salbutamol<br>Anticoagulants (not<br>specified) * | -DM type II<br>-dyslipidemia<br>-AVB 1st degree and<br>LAFB                                                 | -COPD stage II<br>-asthma                              | -prostate cancer (autopsy finding)<br>-pancreatic neuroendocrine tumor<br>(autopsy finding)<br>-ankylosing spondylarthritis                                                                                                                                                                                                                             |

|    |       |      |                      |                                                                                                      |                                                                           |                                                                                                                                                               |                                                       |                                                                                                                                                                                                      |
|----|-------|------|----------------------|------------------------------------------------------------------------------------------------------|---------------------------------------------------------------------------|---------------------------------------------------------------------------------------------------------------------------------------------------------------|-------------------------------------------------------|------------------------------------------------------------------------------------------------------------------------------------------------------------------------------------------------------|
|    |       |      |                      |                                                                                                      |                                                                           |                                                                                                                                                               |                                                       | -h/o cerebellar ischemic stroke (9 years ago)                                                                                                                                                        |
| 9  | M, 75 | 24.7 | 17 [5]               | Amoxicillin-clavulanic acid<br>Flucloxacillin<br>Rifampicin<br>Gentamicin<br>Meropenem<br>Atazanavir | Acenocoumarol*<br>Spironolactone <sup>s</sup><br>Perindopril <sup>s</sup> | -DM type II<br>-hypertrophic and valvular cardiomyopathy<br>-h/o aortic valve replacement<br>-pacemaker due to complete heart block<br>-systemic hypertension | -former smoker                                        | -metatarso-phalangeal osteoarthritis (left hallux) due to diabetic foot ulcer with secondary bacteremia (methicillin-susceptible Staphylococcus aureus and Proteus mirabilis) (1 month before death) |
| 10 | F, 73 | 26   | 21 [14]              | Hydrochloroquin<br>Lopinavir/ritonavir<br>Piperacillin-tazobactam<br>Ceftriaxone                     | Clexane: low molecular weight heparin*                                    | -systemic hypertension                                                                                                                                        |                                                       | -lung cancer (autopsy finding)<br>-paranoid schizophrenia (institutionalized patient )<br>-h/o breast carcinoma (8 years ago)<br>-malnutrition                                                       |
| 11 | M, 60 | 25.1 | 18 <sup>+</sup> [17] | Vancomycin Rifampicin<br>Imipenem                                                                    | Lysis therapy (suspicion for pulmonary embolism) *                        | -DM type II<br>-systemic hypertension with peripheral arterial disease<br>-ischemic cardiomyopathy (h/o coronary stenting 1 year ago)                         | -COPD with asthma component<br>-active smoking (80py) | -alcoholism<br>-prostate cancer (autopsy finding)                                                                                                                                                    |
| 12 | M, 69 | 23   | 38 <sup>+</sup> [22] | Hydroxychloroquin<br>Amoxicillin-clavulanic acid                                                     | Clopidogrel*, ASA*, UFH*<br>Levosimendan                                  | -dilated cardiomyopathy                                                                                                                                       |                                                       |                                                                                                                                                                                                      |

|  |  |  |  |                                                                                |  |                                                                                                                                                           |  |  |
|--|--|--|--|--------------------------------------------------------------------------------|--|-----------------------------------------------------------------------------------------------------------------------------------------------------------|--|--|
|  |  |  |  | Azithromycin<br>Piperacillin-tazobactam<br>Cefepime<br>Meropenem<br>Vancomycin |  | (mixed: ischemic, hypertensive, genetic)<br>-h/o coronary stenting<br>-automatic defibrillator (since 9 years)<br>-systemic hypertension<br>-dyslipidemia |  |  |
|--|--|--|--|--------------------------------------------------------------------------------|--|-----------------------------------------------------------------------------------------------------------------------------------------------------------|--|--|

\*Duration of symptoms unknown; the number of days provided is the duration of hospitalization.

\*Anticoagulants

§agents interfering with renin–angiotensin–aldosterone system (RAAS), directly or indirectly: ACE-Inhibitors, AT1-Inhibitors (ARBs), renin-inhibitors, aldosterone-antagonists

ASA, acetylsalicylic acid; AVB, atrioventricular block; COPD, chronic obstructive pulmonary disease; DM, diabetes mellitus; h/o, history of; KDIGO, “Kidney Disease: Improving Global Outcomes”; py, pack years; TURP, transurethral resection of the prostate; UFH, Unfractionated heparin;

**Supplementary Table S2.** Postmortem cardio-pulmonary and other significant findings in the patient cohort.

| Case | Number of FFPE blocks |       | Lung findings                                                                                                                                    | Heart findings                                                                                             | Malignant neoplastic disease               | Other significant findings                                                                                                                                              |
|------|-----------------------|-------|--------------------------------------------------------------------------------------------------------------------------------------------------|------------------------------------------------------------------------------------------------------------|--------------------------------------------|-------------------------------------------------------------------------------------------------------------------------------------------------------------------------|
|      | Lung                  | Heart |                                                                                                                                                  |                                                                                                            |                                            |                                                                                                                                                                         |
| 1    | 27                    | 16    | -weight: 960g<br>-DAD exudative phase<br>-pleural effusion: absent                                                                               | weight 480g; hypertrophy, patchy fibrosis                                                                  | Follicular lymphoma, in complete remission | Spleen: atrophy and necrosis (shock related) Liver: low-grade centrilobular, macrovesicular steatosis; Pancreas with low-grade chronic fibrosis                         |
| 2    | 14                    | 6     | -weight: 1200g<br>-DAD exudative phase<br>-acute bronchopneumonia, upper lobe predominant, focally with aspirate<br>-pleural effusion: 60ml/60ml | weight 420g; biventricular hypertrophy; CAD with stenosis up to 70%; fibrotic scar left ventricle (0.7cm); |                                            | signs of shock in kidney and liver; liver: lobular inflammation and necrosis, steatosis grade 1 and low-grade fibrosis (METAVIR F1); moderate systemic arteriosclerosis |
| 3    | 28                    | 7     | -weight: 1500g<br>-DAD late exudative phase<br>-acute bronchopneumonia in all lobes                                                              | weight 400g; hypertrophy; CAD with stenosis up to 30%; patchy fibrosis                                     |                                            | Liver: low-grade macrovesicular steatosis (grade 1) and low-grade fibrosis (METAVIR F1); severe systemic arteriosclerosis;                                              |

|   |    |   |                                                                                                                                                                                    |                                                                                                     |                                                                                                                                                  |                                                                                                                                                  |
|---|----|---|------------------------------------------------------------------------------------------------------------------------------------------------------------------------------------|-----------------------------------------------------------------------------------------------------|--------------------------------------------------------------------------------------------------------------------------------------------------|--------------------------------------------------------------------------------------------------------------------------------------------------|
|   |    |   | -pleural effusion: 40ml/60ml                                                                                                                                                       |                                                                                                     |                                                                                                                                                  |                                                                                                                                                  |
| 4 | 28 | 4 | -weight: 2390g<br>-DAD, late exudative/early proliferative phase<br>-focal interstitial and vascular amyloidosis<br>-pleural effusion: 240ml/180ml                                 | weight 420g; hypertrophy, CAD with stenosis up to 50%; low-grade diffuse interstitial fibrosis      |                                                                                                                                                  | Diabetic and hypertensive nephropathy; moderate systemic arteriosclerosis; chronic gastritis.                                                    |
| 5 | 43 | 4 | -weight: 1970g<br>-DAD exudative phase<br>-acute bronchopneumonia in all lobes<br>-pleural effusion: 120ml/120ml                                                                   | weight 330g; hypertrophy; pacemaker in place.                                                       |                                                                                                                                                  | Kidney stones; moderate systemic arteriosclerosis; Liver: macrovesicular steatosis grade 2; gallbladder stones;                                  |
| 6 | 18 | 8 | -weight: 1870g<br>-DAD late exudative phase/focally proliferative phase<br>-acute bronchopneumonia in all lobes<br>-pleural effusion: absent                                       | weight 410g; status post myocardial infarction with a 1.5 cm scar (apical posterior left ventricle) |                                                                                                                                                  | Hepatomegaly with macrovesicular steatosis grade 3; hypertensive nephropathy and signs of shock in the kidneys; severe systemic arteriosclerosis |
| 7 | 17 | 6 | -weight 1630g<br>-acute and necrotizing aspiration bronchopneumonia in all lobes<br>-No DAD.<br>(clinical/radiological picture: aspiration pneumonia)<br>-pleural effusion: absent | weight 360g                                                                                         |                                                                                                                                                  | none                                                                                                                                             |
| 8 | 23 | 6 | -weight: 2060g<br>-DAD proliferative phase<br>-bilateral peripheral emboli with focal, small hemorrhagic infarction<br>-pleural effusion: 360ml/40ml                               | weight 390g; concentric right ventricular hypertrophy; focal fibrosis in one left papillary muscle; | -Adenocarcinoma of the prostate (aT2c aN0 aM0; Gleason grade 3+3=6; Grade group 1);<br>-Pancreatic neuroendocrine tumor (NET G1; 0.7cm diameter) | signs of shock in the kidneys; light steatotic hepatomegaly (grade 1); splenomegaly; moderate systemic arteriosclerosis;                         |

|    |    |   |                                                                                                                                                                                                           |                                                                                                                                                          |                                                                                     |                                                                                                                                                                                                       |
|----|----|---|-----------------------------------------------------------------------------------------------------------------------------------------------------------------------------------------------------------|----------------------------------------------------------------------------------------------------------------------------------------------------------|-------------------------------------------------------------------------------------|-------------------------------------------------------------------------------------------------------------------------------------------------------------------------------------------------------|
| 9  | 15 | 8 | -weight 2560g<br>-DAD late exudative phase, upper lobe predominant<br>-pleural effusion: 480ml/180ml                                                                                                      | weight 870g; biventricular hypertrophy; with patchy fibrosis; mechanical aortic valve; pacemaker in place                                                |                                                                                     | signs of shock in kidney and liver; Hepatomegaly with steatosis grade 2; moderate systemic arteriosclerosis                                                                                           |
| 10 | 20 | 5 | -weight: 1930g<br>AFOP in all lobes<br>-squamous cell carcinoma left lower lobe, central<br>-mucostasis<br>(microbiology: <i>proteus mirabilis</i> )<br>-pleural effusion: absent                         | weight 510g ; hypertrophy, CAD with stenosis up to 30%;                                                                                                  | Squamous cell carcinoma left lower lobe, central, diameter 6cm (aT3 aN1 aM0)        | Hepatomegaly, Splenomegaly; severe systemic arteriosclerosis                                                                                                                                          |
| 11 | 26 | 5 | -weight: 1860g<br>-DAD proliferative phase<br>-aspergillosis in the upper left lobe with bronchial ulceration and associated focal peribronchial abscessing bronchopneumonia<br>-pleural effusion: absent | weight 470g, hypertrophy; CAD with stenosis up to 80%                                                                                                    | -Adenocarcinoma of the prostate (aT2c aN0 aM0; Gleason grade 3+4=7; Grade group 2); | moderate systemic arteriosclerosis                                                                                                                                                                    |
| 12 | 15 | 8 | -weight: 1860g<br>-DAD proliferative phase in all lobes<br>-focal acute bronchopneumonia<br>(microbiology: <i>serratia marcescens</i> )<br>-pleural effusion: absent                                      | weight 540g; biventricular hypertrophy; focal amyloidosis; CAD with stenosis up to 50% and two scar regions (2cm each) and aneurysm; pacemaker in place; |                                                                                     | signs of shock in kidney and liver; liver with central fibrosis (METAVIR F2); moderate systemic arteriosclerosis; focal renal infarction with a fresh thromb-embolus; femoral deep venous thrombosis; |

DAD, diffuse alveolar damage; AFOP, acute fibrinous and organizing pneumonia; CAD, coronary artery disease;

**Supplementary Table S3.** Detailed histological pulmonary findings of the patient cohort.

| Case | Lung findings (detailed) |                    |                   |                                  |                   |                           |              |                          |                                                                                                            |                 |                               |
|------|--------------------------|--------------------|-------------------|----------------------------------|-------------------|---------------------------|--------------|--------------------------|------------------------------------------------------------------------------------------------------------|-----------------|-------------------------------|
|      | congestion               | Interstitial edema | Hyaline membranes | Intraalveolar fibrinous exudates | Pneumocyte atypia | Intracellular giant cells | organization | Squamous cell metaplasia | Bronchitis or pneumonia                                                                                    | endothelialitis | (micro-) thrombi and infarcts |
| 1    | yes                      | no                 | yes               | no                               | mild              | no                        | no           | no                       | no                                                                                                         | no              | no                            |
| 2    | yes                      | yes                | yes               | no                               | yes               | no                        | no           | no                       | acute bronchitis with associated suppurative bronchopneumonia in all lobes (UL predominant)                | yes             | no                            |
| 3    | yes                      | yes                | yes               | yes                              | yes               | yes                       | no           | yes                      | suppurative and necrotising bronchopneumonia in all lobes                                                  | yes             | microthrombi, no infarcts     |
| 4    | yes                      | no                 | yes               | no                               | yes               | few                       | beginning    | yes                      | minimal chronic bronchitis                                                                                 | yes             | microthrombi, no infarcts     |
| 5    | yes                      | yes                | yes               | no                               | yes               | no                        | no           | yes                      | suppurative bronchopneumonia in all lobes; large bronchi without inflammation.                             | yes             | microthrombi, no infarcts     |
| 6    | yes                      | yes                | yes               | yes (associated with pneumonia)  | yes               | yes                       | beginning    | focal                    | focal acute bronchitis with associated suppurative (and focally necrotising) bronchopneumonia in all lobes | no              | no                            |
| 7    | yes                      | yes                | no                | present                          | no                | no                        | no           | no                       | suppurative and necrotising bronchopneumonia in all lobes with abundant bacteria.                          | no              | no                            |



|    |         |         |         |                                  |         |         |           |           |                                                                                                                                                                                                                                                                                                 |     |                                                                |  |
|----|---------|---------|---------|----------------------------------|---------|---------|-----------|-----------|-------------------------------------------------------------------------------------------------------------------------------------------------------------------------------------------------------------------------------------------------------------------------------------------------|-----|----------------------------------------------------------------|--|
| 8  | yes     | yes     | yes     | yes                              | yes     | few     | yes       | yes       | mild chronic bronchitis                                                                                                                                                                                                                                                                         | yes | peripheric emboli with focal associated hemorrhagic infarction |  |
| 9  | yes     | yes     | yes     | yes                              | yes     | yes     | beginning | focal     | mild chronic bronchitis                                                                                                                                                                                                                                                                         | yes | no                                                             |  |
| 10 | yes     | yes     | no      | yes                              | yes     | yes     | yes       | yes       | no                                                                                                                                                                                                                                                                                              | yes | no                                                             |  |
| 11 | yes     | yes     | no      | Focal, associated with pneumonia | severe  | yes     | yes       | prominent | focal acute bronchitis in all lobes, with associated mucostasis and small foci of pneumonia; in the left superior lobe bronchitis due to non-invasive aspergilloma, with ulcer and peribronchial necrotising, absceding pneumonia and surrounding AFOP, and blood clots in the bronchial lumina | no  | no                                                             |  |
| 12 | present | present | present | present                          | present | present | present   | no        | focal pneumonia (right lower lobe)                                                                                                                                                                                                                                                              | yes | no                                                             |  |
